# Supplementary material for: Radiation treatment curtails pro-tumorigenic functions from cancer-associated fibroblasts in preclinical models
Source: Research Square preprint supplement (doi:10.21203/rs.3.rs-8680198/v1), 2026-02-18
Supplement: Supplementary file 2 [file 36c8de64c1167910dcc34cf1.docx]

**Table S3** – Clinicopathological variables (A) and CAF marker expression (B) as prognostic indicators of disease-specific survival in non-small cell lung cancer patients after resection and adjuvant radiotherapy (n = 76, log-rank test).

|  | **N (%)** | **5 Year** | **Median** | **HR (95%CI)** | ***P*** |
| --- | --- | --- | --- | --- | --- |
|  |  |  |  |  |  |
| **Age** |  |  |  |  | 0.484 |
| ≤65 | 40 (53) | 37 | 44 | 1 |  |
| >65 | 36 (47) | 42 | 30 | 0.81 (0.45-1.45) |  |
|  |  |  |  |  |  |
| **Gender** |  |  |  |  | 0.213 |
| Female | 24 (32) | 48 | 57 | 1 |  |
| Male | 52 (68) | 34 | 25 | 1.48 (0.82-2.68) |  |
|  |  |  |  |  |  |
| **Weight loss** |  |  |  |  | 0.159 |
| <10% | 68 (89) | 40 | 41 | 1 |  |
| ≥10% | 8 (11) | 29 | 12 | 1.92 (0.57-6.5) |  |
|  |  |  |  |  |  |
| **Smoking** |  |  |  |  | 0.792 |
| Never | 2 (3) | 50 | 8 | 1 |  |
| Present | 44 (58) | 33 | 36 | 1.38 (0.23-8.2) |  |
| Previous | 30 (39) | 46 | 38 | 1.13 (0.19-6.85) |  |
|  |  |  |  |  |  |
| **ECOG** |  |  |  |  | 0.161 |
| Normal | 38 (50) | 44 | 47 | 1 |  |
| Slightly reduced | 34 (45) | 32 | 26 | 1.63 (0.89-2.96) |  |
| In bed <50% | 4 (5) | 67 | NA | 0.51 (0.14-1.93) |  |
|  |  |  |  |  |  |
| **Histology** |  |  |  |  | 0.008 |
| LUSC | 44 (58) | 56 | 114 | 1 |  |
| LUAD | 31 (41) | 9 | 19 | 2.28 (1.23-4.21) |  |
| Other | 1 (1) | 0 | 15 | 4.14 (0.15-116.39) |  |
|  |  |  |  |  |  |
| **pStage** |  |  |  |  | 0.019 |
| I | 10 (13) | 67 | NA | 1 |  |
| II | 22 (29) | 52 | 64 | 2.13 (0.92-4.96) |  |
| III | 44 (58) | 24 | 19 | 3.85 (1.73-8.56) |  |
|  |  |  |  |  |  |
| **Differentiation** |  |  |  |  | 0.113 |
| Poor | 7 (9) | 62 | NA | 1 |  |
| Moderate | 39 (51) | 27 | 19 | 3.37 (1.28-8.9) |  |
| Well | 30 (39) | 47 | 57 | 2.2 (0.84-5.77) |  |
|  |  |  |  |  |  |
| **Vasc+** |  |  |  |  | 0.003 |
| No | 55 (72) | 49 | 57 | 1 |  |
| Yes | 21 (28) | 12 | 16 | 2.37 (1.15-4.9) |  |
| **B)** |  |  |  |  |  |
|  |  |  |  |  |  |
| **FAP-1** |  |  |  |  | 0.587 |
| Low | 42 (55) | 37 | 41 | 1 |  |
| High | 30 (39) | 44 | 36 | 0.84 (0.46-1.54) |  |
| Missing | 4 (5) |  |  |  |  |
|  |  |  |  |  |  |
| **αSMA** |  |  |  |  | 0.990 |
| Low | 55 (72) | 40 | 41 | 1 |  |
| High | 21 (28) | 35 | 25 | 1 (0.52-1.92) |  |
|  |  |  |  |  |  |
| **PDGFRα** |  |  |  |  | 0.153 |
| Low | 46 (61) | 48 | 57 | 1 |  |
| High | 22 (29) | 31 | 24 | 1.6 (0.78-3.27) |  |
| Missing | 8 (11) |  |  |  |  |
|  |  |  |  |  |  |
| **PDGFRβ** |  |  |  |  | 0.199 |
| Low | 41 (54) | 49 | 54 | 1 |  |
| High | 29 (38) | 33 | 21 | 1.5 (0.79-2.83) |  |
| Missing | 6 (8) |  |  |  |  |
