# Supplementary material for: Radiation treatment curtails pro-tumorigenic functions from cancer-associated fibroblasts in preclinical models
Source: Research Square preprint supplement (doi:10.21203/rs.3.rs-8680198/v1), 2026-02-18
Supplement: Supplementary file 5 [file c02bf76d8dbcd3ababf28bed.docx]

Table S1: Clinical and patient records corresponding to CAF donors and donor-derived tumor cells used in this study.

| **Donor** | **Our code** | **Sex** | **Tumor type** | **T-size**  **(mm)** | **Stage** |
| --- | --- | --- | --- | --- | --- |
| CAF #1 | 191 | Female | Adeno-squamous carcinoma | 60 | pT3N0Mx |
| CAF #2 | 229 | Male | Non-keratinized  squamous cell carcinoma | 24 | pT2N2Mx |
| CAF #3 | 201 | Male | Pleomorphic adenocarcinoma | 46 | pT2bN0Mx |
| CAF #4 | 193 | Male | Squamous cell carcinoma | 24 | pT1cN0Mx |
| CAF #5 | 108 | Female | Keratinized  squamous cell carcinoma | 42 | pT2bN0Mx |
| CAF #6 | 242 | Male | Squamous cell carcinoma | 25 | pT1cN0Mx |
| CAF #7 | 247 | Male | Adenocarcinoma | 62 | pT3N0Mx |
| CAF #8 | 68 | Female | Adenocarcinoma | 21 | pT1cN0Mx |
| CAF #9 | 151 | Male | Adenocarcinoma | 20 | pT1bN2M |
| CAF #10 | 165 | Male | Adenocarcinoma | 50 | pT2bN0M |
| Donor-TC | 209 | Male | Adenocarcinoma | 35 | pT2N0Mx |
