# Supplementary material for: Radiation treatment curtails pro-tumorigenic functions from cancer-associated fibroblasts in preclinical models
Source: Research Square preprint supplement (doi:10.21203/rs.3.rs-8680198/v1), 2026-02-18
Supplement: Supplementary file 6 [file cc4c2833c839198a2846fcf3.docx]

**Table S2** - List of antibodies used for Western blot and flow cytometry analysis. Antibodies used in this study are listed along with catalog numbers and concentrations used. WB=Western blotting; FC=Flow cytometry.

| **Protein** | **Antibody** | **Concentration** |
| --- | --- | --- |
| FAP-1 | Cell Signaling, #66562 | 1:1000 (WB) |
| FSP1 (S100A4) | Cell Signaling, #13018 | 1:1000 (WB) |
| α-SMA | Cell Signaling, #19245 | 1:1000 (WB) |
| PDGFR-α | Cell Signaling, #3174 | 1:1000 (WB) |
| PDGFR-β | Cell Signaling, #3169 | 1:1000 (WB) |
| Podoplanin | Cell Signaling, #9047 | 1:1000 (WB) |
| E-cadherin | Cell Signaling, #3195 | 1:1000 (WB) |
| β-catenin | Cell Signaling, #8480 | 1:1000 (WB) |
| Vimentin | Cell Signaling, #5741 | 1:1000 (WB) |
| β-actin | Cell Signaling, #8457 | 1:1000 (WB) |
| FAP-1 | Bioss Antibodies, bs5758-A680 | 1:50 (FC) |
| α-SMA | ThermoFisher Scientific, 53-9760-82 | 1:100 (FC) |
